# Supplementary material
Source: PubMed Central journal article supplement (PMC3137051)
Supplement: supp_M111.250779_jbc.M111.250779-1.pdf [file supp_M111.250779_jbc.M111.250779-1.pdf]

## Supplemental Figure Legends

**Supplemental Figure 1. Determination of Optimal Time Course for the in-vitro assay for DES activity.** The Y axis represents the amount of radiolabeled formed water (in dpm) (divided by 2). For this experiment, 100  $\mu$ g rat liver microsomes were incubated with 2 nM of labeled substrate (equal to 0.125  $\mu$ Ci, or about 100,000 dpm) and 500 nM of cold substrate at the time points indicated on the X axis. Data shown is representative of 2 independent experiments performed in quadruplicate. The data demonstrate the 20 minutes of incubation time is within the linear range of the assay.

**Supplemental Figure 2. Determination of Optimal Protein Concentration for in-vitro assay for DES activity.** The Y axis represents the amount of radiolabeled formed water (in dpm) (divided by 2). For this experiment, increasing amounts (50 – 450  $\mu$ g) of rat liver microsomes were incubated with 2 nM of labeled substrate (equal to 0.125  $\mu$ Ci, or about 100,000 dpm) and 500 nM of cold substrate for 20 minutes. Data shown is representative of 2 independent experiments performed in triplicate. The data demonstrate the 100  $\mu$ g of protein is within the linear range of the assay.

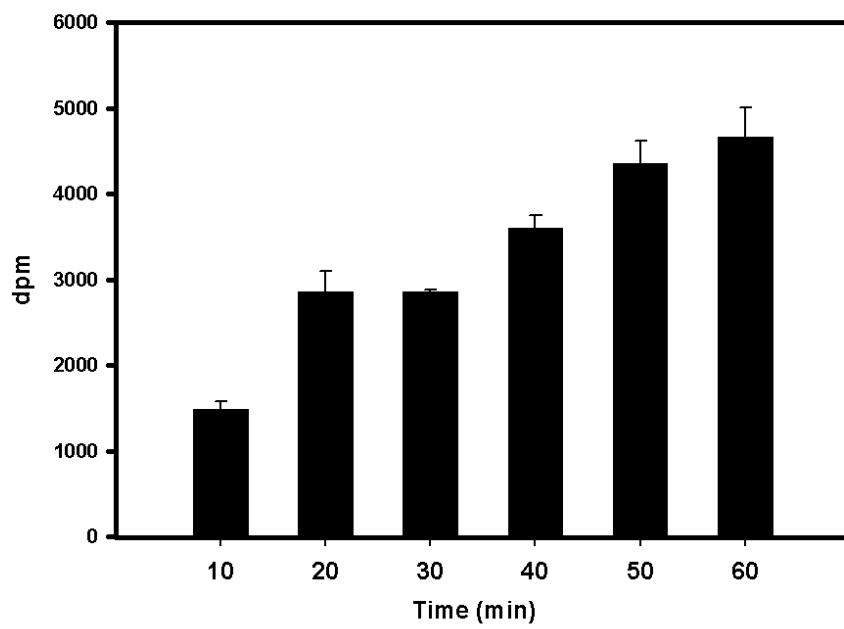

Sup Fig 1

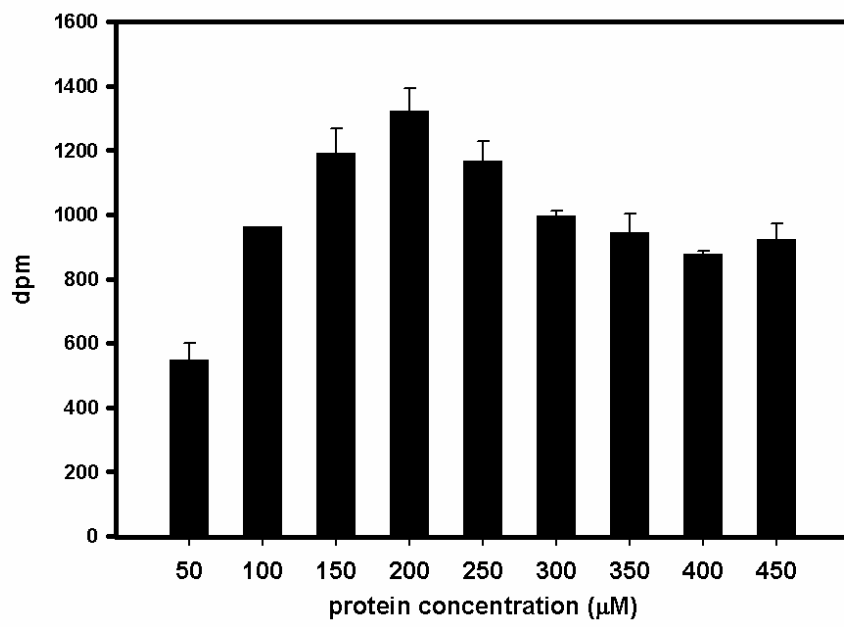

Sup Fig 2
